# Supplementary material for: Single-cell multi-omics identify novel regulators required for osteoclastogenesis during aging
Source: PubMed Central journal article supplement — iScience. 2024 Aug 18;27(9):110734. doi: 10.1016/j.isci.2024.110734 (PMC11401210; doi:10.1016/j.isci.2024.110734), 2024-08-18
Supplement: mmc1.pdf [file mmc1.pdf]

**Supplemental information**

**Single-cell multi-omics identify novel regulators  
required for osteoclastogenesis during aging**

**Hao Li, Wan-Xing Xu, Jing-Cong Tan, Yue-Mei Hong, Jian He, Ben-Peng Zhao, Jin-An Zhou, Yu-Min Zheng, Ming Lei, Xiao-Qi Zheng, Jun Ding, Ning-Ning Liu, Jun-Jie Gao, Chang-Qing Zhang, and Hui Wang**

**Figure S1. GO enrichment analysis through comparing 6 m and 20 m WT (top) or 6 m KO group (bottom), Related to Figure 1.**

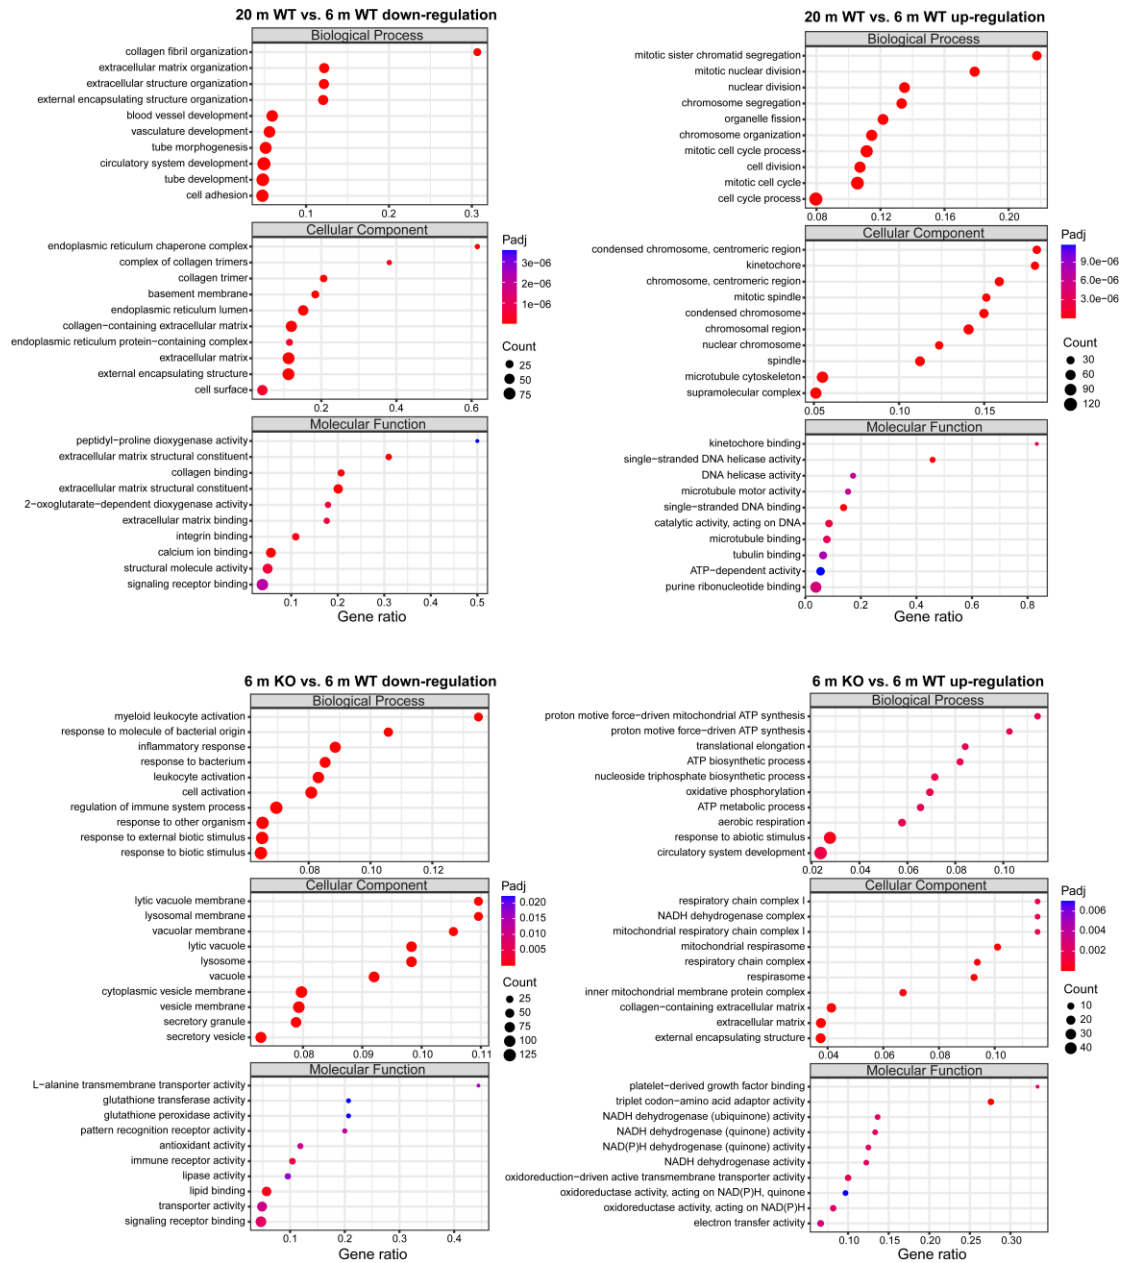

Dotplots of GO enrichment results. Each category (Biological Process, Molecular Function, or Cellular Component) shows top 10 GO terms.

**Figure S2. Gene expression of critical genes in different cell populations, Related to Figure 2.**

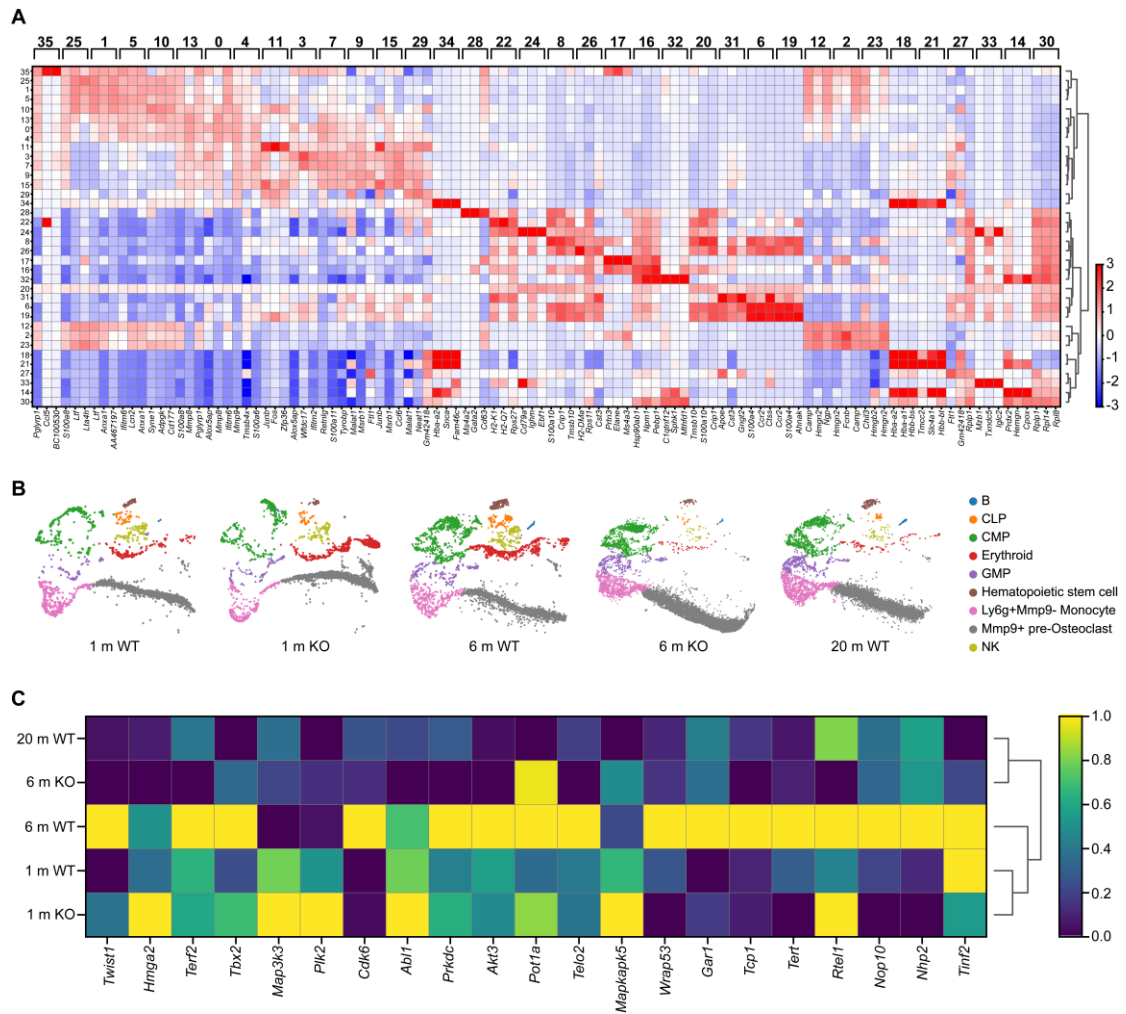

(A) The signature genes for each of the clusters.

(B) UMAP plots of each ageing group.

(C) *Terc*-associated genes expression across different age groups.

**Figure S3. The cell composition of cell clusters in the osteoclast committed trajectory (16→17→2→12), Related to Figure 4 and Figure**

**5.**

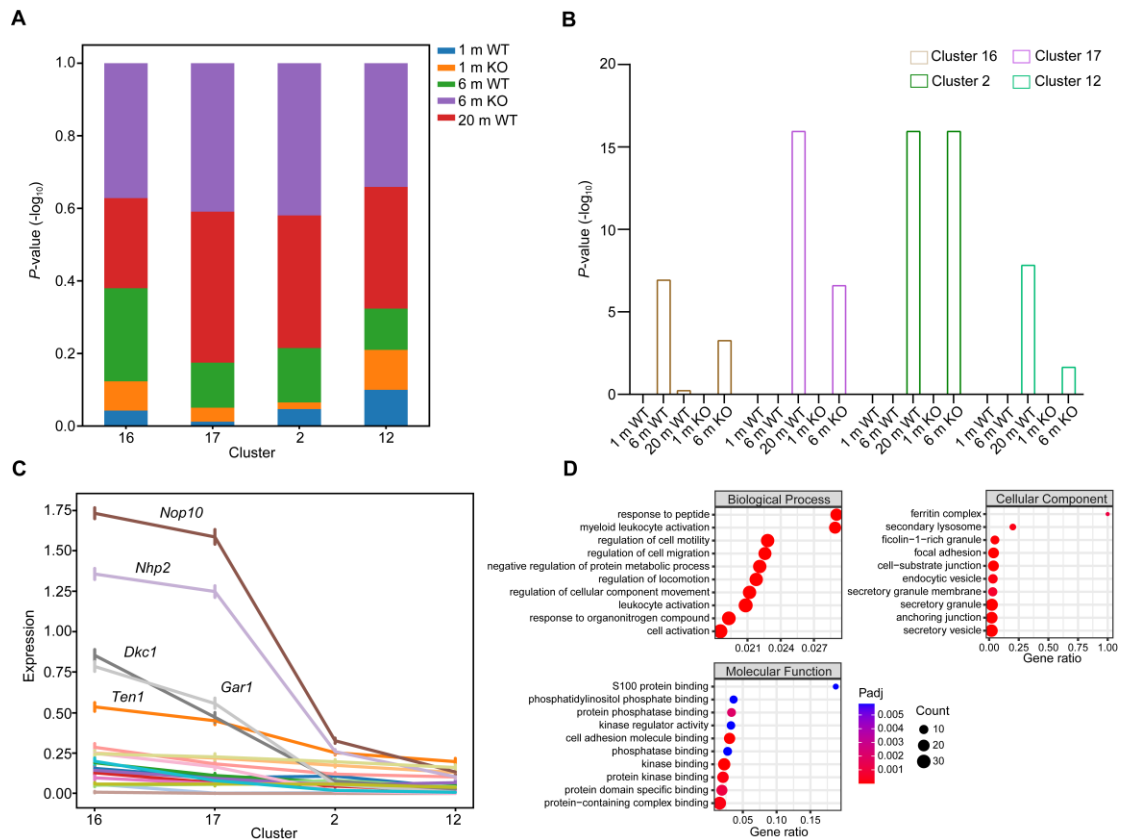

(A) The aged cells (20 m WT and 6 m KO) are dominating this osteoclast committed trajectory, which accounts for more than over 60% of cells in all clusters of this trajectory.

(B) shows that cluster 17, 2, and 12 are all significantly enriched with aged cells (20 m WT and 6 m KO) while the starting cluster (16) is significantly enriched with the adult cells (6 m WT).

(C) The expression of *Terc* relevant genes are generally decreasing along with the osteoclast committed trajectory.

(D) GO enrichment analysis of DEGs in Figure 5C.

**Figure S4. shRNA-lentivirus infection of in-vitro cultured BMMs,  
Related to Figure 7.**

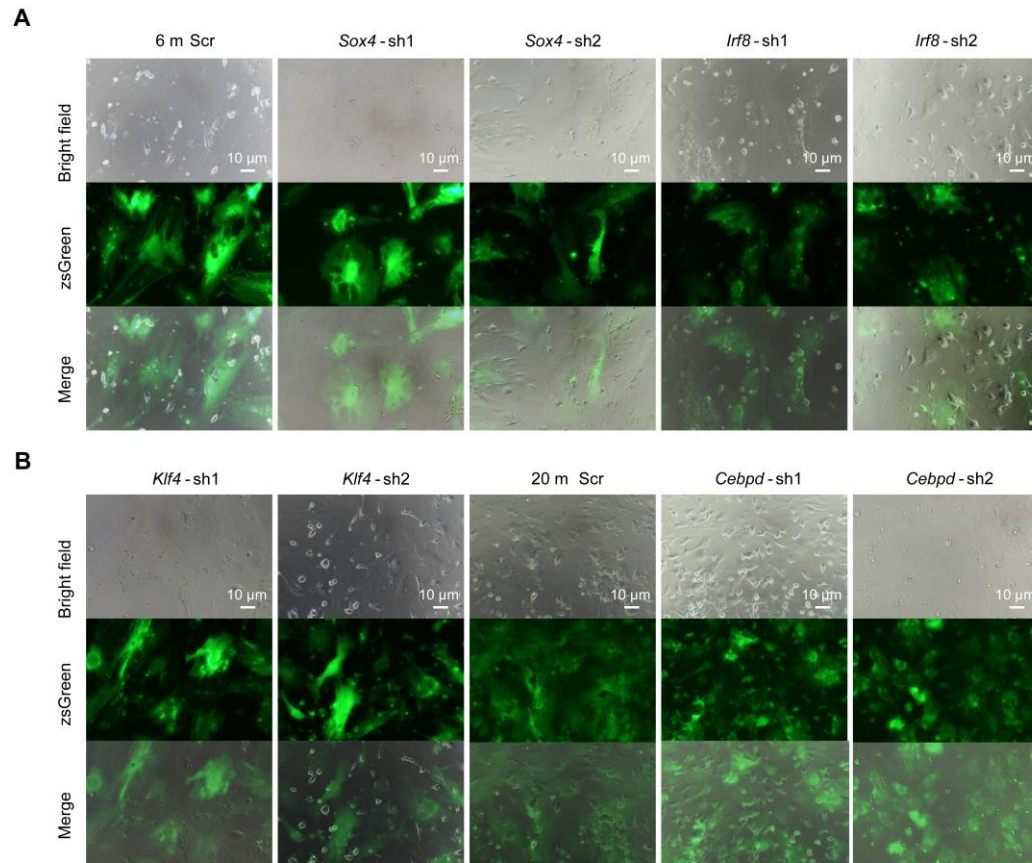

The lentivirus vectors with reporter of zsGreen infected in vitro culture BMMs harvested from mice bone marrow.
